# Supplementary material
Source: PubMed Central journal article supplement (PMC2851746)
Supplement: 0809398107_pnas.200809398SI.pdf [file 0809398107_pnas.200809398SI.pdf]

# Supporting Information

Yamaguchi et al. 10.1073/pnas.0809398107

## SI Materials and Methods

**Fly Stocks.** Fly stocks were raised on standard medium under a constant light and dark cycle (14 h/10 h). Flies were raised at 25 °C, 60% relative humidity, unless described otherwise. Mutant lines used are as follows: *rh5<sup>2</sup>* (1), *rh6<sup>1</sup>* (2), *sev<sup>LY3</sup>*, UAS-*lacZ<sup>melt</sup>* (*meltGOF*)(3), *ninaE17* (Berlin background), and *ninaEP[rh1>3]* (4). Gal4 driver and effector lines used were *panR7-Gal4* driver (3), *rh1-Gal4* driver (5), and UAS-*shibire<sup>ts1</sup>* (6, 7). Wild-type Canton-S (CS) and Berlin were used, and no significant difference was observed between the two wild types in the assays. Mutants are in a CS background unless stated otherwise. All flies are wild type for eye color.

**Behavioral Assays.** Preference index (PI) was calculated as described in *Results*. The PI ranged from -1 to 1; when all flies preferred longer wavelength (blue > UV or green > blue), PI was 1. When there was no preference (i.e., flies distribute 50:50), PI was 0, and when all flies preferred the shorter wavelength, PI was -1.

In the “light vs. dark” experiments, flies were placed in a T-maze with two tubes, with a light on one side and no light on the other. After the flies were placed at the choice point of the T-maze, they moved toward the illuminated tube when the light intensity was above the phototaxis threshold.

*shibire* experiments were performed as follows: UAS-*shi<sup>ts</sup>* flies (6, 7) were raised at 18 °C until adulthood. Flies were incubated at 34–36 °C for 30 min before the experiments. Experiments were performed at 34–36 °C.

**LEDs and Spectroradiometry.** An OceanOptics USB2000 spectroradiometer was used. The relative quantal emission and spectral curves of the LEDs were measured with the spectroradiometer, as described previously (1). The relative quantum capture of each subclass of photoreceptors is shown in Fig. 1C for UV/B (*Upper*) or for B/G (*Lower*). The spectroradiometer was calibrated using a standard calibration lamp (LS-1-CAL; OceanOptics) for measuring absolute intensities of visible (blue and green) stimuli. Because the calibration underestimates the irradiance of UV light, a photomultiplier (international light, PM270/IL700) was additionally used for the correction of UV irradiance. The irradiance ratio between UV and blue LEDs was measured by the photo-

multiplier, and the spectral curves measured by the spectroradiometer were corrected accordingly. The relative sensitivity of each subclass of photoreceptors is shown in Fig. 1C, which indicates the relative number of quanta captured by each photoreceptor subtype for UV/B (*Upper*) or for B/G (*Lower*). It was calculated as follows: the spectral curves of LEDs measured by spectroradiometer were corrected by the photomultiplier to estimate the precise irradiance ratio between UV/B LEDs (Fig. 1B, *Upper*) and B/G LEDs (Fig. 1B, *Lower*). The relative sensitivity of each photoreceptor subtype in Fig. 1A was taken from refs. 8 and 9 and R. Hardie (unpublished data). For each PR subtype, the PR sensitivity was multiplied by the relative irradiance at each wavelength for each LED, and the value was integrated over all wavelengths.

Intensities of the LEDs were adjusted electronically. The intensities used are as follows: UV— $2.1 \times 10^{12}$  quanta·cm<sup>-2</sup>·s<sup>-1</sup>; blue— $1.2 \times 10^{14}$  quanta·cm<sup>-2</sup>·s<sup>-1</sup> for UV/B experiments; blue— $1.4 \times 10^{12}$  quanta·cm<sup>-2</sup>·s<sup>-1</sup>; and green— $1.1 \times 10^{13}$  quanta·cm<sup>-2</sup>·s<sup>-1</sup> for B/G experiments.

**Statistical Analyses.** For comparison between genotypes, Kruskal-Wallis test was performed to detect overall significance. For pairwise comparisons, Mann-Whitney U test was performed. For all multiple comparisons, Bonferroni correction was applied. In all figures, one, two, and three asteriks indicate an a-level of 0.05, 0.01 and 0.001, respectively. The significance before Bonferroni correction is indicated in parentheses.

## Calculating an Additive Model.

For each genotype, the expected relative sensitivities for UV, blue, and green can be calculated by assuming additive contributions and by choosing appropriate weight factors for the photoreceptor types. Taking into account the 30:70 p:pyratios in R7 and R8 as well as the ratio of inner-to-outer photoreceptors (1:6), one would arrive at a sensitivity of  $S_{WT} = [a \cdot R7p \cdot 0.3 + b \cdot R7y \cdot 0.7 + c \cdot R8p \cdot 0.3 + d \cdot R8y \cdot 0.7 + e \cdot (R1-R6) \cdot 6]$  for wild type and  $S_{melt} = [a \cdot R7p \cdot 0.3 + b \cdot R7y \cdot 0.7 + c \cdot R8p \cdot 1 + e \cdot (R1-R6) \cdot 6]$  for *melt<sup>GOF</sup>* flies. The *R* values (e.g., R7p) would represent the sensitivities of the photoreceptor types as shown in Fig. 1C, the factors (a–e) would give their relative weights, and the numbers at the end of each term would give their relative abundance in the eye.

1. Yamaguchi S, Wolf R, Desplan C, Heisenberg M (2008) Motion vision is independent of color in *Drosophila*. *Proc Natl Acad Sci USA* 105:4910–5.
2. Cook T, Pichaud F, Sonnevile R, Papatsenko D, Desplan C (2003) Distinction between color photoreceptor cell fates is controlled by Prospero in *Drosophila*. *Dev Cell* 4:853–64.
3. Mikeladze-Dvali T, et al. (2005) The growth regulators warts/lats and melted interact in a bistable loop to specify opposite fates in *Drosophila* R8 photoreceptors. *Cell* 122:775–87.
4. Feiler R, et al. (1992) Ectopic expression of ultraviolet-rhodopsins in the blue photoreceptor cells of *Drosophila*: visual physiology and photochemistry of transgenic animals. *J Neurosci* 12:3862–8.
5. Rister J, Heisenberg M (2006) Distinct functions of neuronal synaptobrevin in developing and mature fly photoreceptors. *J Neurobiol* 66:1271–84.

6. Kitamoto T (2001) Conditional modification of behavior in *Drosophila* by targeted expression of a temperature-sensitive *shibire* allele in defined neurons. *J Neurobiol* 47: 81–92.
7. Waddell S, Armstrong JD, Kitamoto T, Kaiser K, Quinn WG (2000) The amnesiac gene product is expressed in two neurons in the *Drosophila* brain that are critical for memory. *Cell* 103:805–13.
8. Salcedo E, et al. (1999) Blue- and green-absorbing visual pigments of *Drosophila*: ectopic expression and physiological characterization of the R8 photoreceptor cell-specific Rh5 and Rh6 rhodopsins. *J Neurosci* 19:10716–26.
9. Govardovskii VI, Fyhrquist N, Reuter T, Kuzmin DG, Donner K (2000) In search of the visual pigment template. *Vis Neurosci* 17:509–28.
